# Supplementary material for: The human box C/D snoRNA U3 is a miRNA source and miR-U3 regulates expression of sortin nexin 27
Source: PubMed Central journal article supplement — Nucleic Acids Res. 2020 Jul 1;48(14):8074–89. doi: 10.1093/nar/gkaa549 (PMC7430653; doi:10.1093/nar/gkaa549), 2020-07-01
Supplement: gkaa549_supplemental_file.pdf [file gkaa549_supplemental_file.pdf]

## SUPPLEMENTARY MATERIAL

### The human box C/D snoRNA U3 is a miRNA source and miR-U3 regulates expression of sortin nexin 27

Nicolas Lemus-Diaz, Rafael Rinaldi Ferreira, Katherine E. Bohnsack, Jens Gruber, Markus T.

Bohnsack

## SUPPLEMENTARY FIGURE LEGENDS

**Supplementary Figure S1. Quality control of small RNA sequencing.** Small RNA-seq was performed on total RNA extracted from HEK293 cells. **(A)** Correlation plot of sequenced libraries L001, L002 and L003 (L001-L002  $R_2=0.972$  L001-L003  $R_2=0.967$ ), colours of dots represent the read numbers of annotated miRNAs and snoRNAs, the side bar shows the values in logarithmic scale. **(B)** Read length distribution of individual small RNA libraries represented as histograms displaying the number of miRNAs (21-22 nt), C/D snoRNAs (70-100 nt) and H/ACA (>130 nt, not sequenced in this preparation). **(C)** Normalised numbers of reads of less than 40 nt in length and the mean expression of H/ACA 45 derived miRNA, mapped to different snoRNAs shown as boxplots. Error bars represent the variation between three independent library preparations.

**Supplementary Figure S2. Fraction of reads mapped to individual classes of miRNA and snoRNA (C/D box and H/ACA).** **(A-C)** Reads of small RNA and CLIP-derived libraries were aligned to the genome and then realigned to a subset of mi/snoRNAs. Bar plots represent the fraction of mapped reads to individual classes of subset RNAs displayed in different colours. Fractions derived from small RNA libraries of total RNA (A), representative data sets of miRNA pathway proteins (B), representative data sets of snoRNA interacting proteins (C).

**Supplementary Figure S3. Correlation of predicted seed pairing stability (SPS) and target abundance (TA) for U3 derived miRNA.** Thermodynamic parameters of RNA duplexes (7mer-

m8) of all possible heptamer sequences (16,384) and the number of non-overlapping 3' UTRs sites (8mer, 7mer-m8, 7mer-1a and 6mer) in reference mRNAs were retrieved from the TargetScan (context+++ code). Scatter plot represents the correlation between TA as logarithmic values versus SPS in kcal/mol ( $R=0.3482$ ,  $p < 2.2e-16$ , Spearman correlation) of all possible heptamer (7 nt sequences). The red dot shows the putative U3-miRNA seed sequence (AGUUUCU), and the reported low proficiency miRNA (miR-23a) is shown in blue.

**Supplementary Figure S4. DROSHA, XPO5 and DICER knock-outs cell lines characterisation. (A-B)** HTC116 parental and knockout cells were examined for protein expression by western blot (A) and miRNA expression by small-RNA seq (B). Barplots depict selected miRNAs as a percentage of all annotated miRNA reads and clustered according to their biogenesis pathway. Error bars represent the SEM of sequencing replicates: 3 parental cell line, 2 DROSHA KO, 2 XPO5 (KO#19 and KO#19-1) and 2 Dicer (KO#43 and KO#45).

**Supplementary Figure S5. Overexpression of Dicer reduces the amount of U3 present in the cytoplasm. (A)** Wild-type HCT116 cells (WT) and Dicer knockout (KO) cells that had been transfected with a plasmid for the expression of Flag tagged Dicer (+) or not (-) were examined for Dicer expression by western blotting. Tubulin was used as a loading control. **(B)** Total RNA extracted from cells as in (A) was separated by denaturing PAGE and analysed by northern blotting using probes hybridising to the indicated RNAs. The levels of cytoplasmic U3 in the cells knockout cells expressing or not expressing exogenous Dicer relative to the wild type, normalised to tRNA<sub>Met</sub>, were determined in three biological and two technical replicates, and data are shown as mean  $\pm$  standard error. Significance was calculated using the one sample t-test; ns – not significant, \*\* -  $p < 0.01$ .

**Supplementary Figure S6. Evolutionary conservation of the U3 miRNA target sequence in the 3' UTR of the SNX27 mRNA.** An alignment of sequences from the U3 snoRNA and the SNX27 mRNA 3' UTR from different species is shown. Multiple sequence alignment of vertebrate U3 snoRNA and SNX27 mRNA sequences was performed using Clustal W with default parameters. Retrieved from ENSEMBL, the sequences from the following species were analysed: *Homo sapiens* (human), *Pan troglodytes* (chimpanzee), *Macaca mulatta* (rhesus macaque), *Dasyus novemcinctus* (armadillo), *Loxodonta africana* (elephant), *Mus musculus* (mouse), *Rattus norvegicus* (rat), *Oryctolagus cuniculus* (rabbit), *Canis lupus familiaris* (dog), *Bos taurus* (cattle), *Echinops telfairi* (hedgehog), *Gallus gallus* (chicken), *Xenopus tropicalis* (frog). The seed sequence of the U3-derived miRNA-like fragment is shown in white, italics and underlined, and the target site (mRNA) is shown in bold, italics and underlined. Nucleotides identified in as chimeric sequences by CLASH are marked in yellow (U3 snoRNA) and green (mRNA).

## SUPPLEMENTARY TABLES

**Supplementary Table S1. Oligonucleotides used in this study**

| <b>Target</b>       | <b>5'-3'sequence</b>                                     | <b>Application</b>  |
|---------------------|----------------------------------------------------------|---------------------|
| U6 forward          | CTCGCTTCGGCAGCACA                                        | qPCR                |
| U6 reverse          | AACGCTTCACGAATTTGCGT                                     | qPCR                |
| U3 forward          | CGAAAACCACGAGGAAGAGA                                     | qPCR                |
| U3 reverse          | CACTCCCCAATACGGAGAGA                                     | qPCR                |
| GAPDH forward       | GTCAGCCGCATCTTCTTTTG                                     | qPCR                |
| GAPDH reverse       | GCGCCCAATACGACCAAATC                                     | qPCR                |
| U3 snoRNA           | GCTCTACACGTTTCAGAGAACTTCTCTAGTAACACACTA<br>TAGAAATGATCCC | Northern blot probe |
| miR-U3              | CTCTACACGTTTCAGAGAACTT                                   | Northern blot probe |
| U6                  | ATATGGAACGCTTCACGAATTTGCGTGTCATCCTTGCG<br>C              | Northern blot probe |
| ACA45               | TCAAGGACTCTATTTTCTTAGTCTCCA                              | Northern blot probe |
| tRNA <sub>Met</sub> | ATGGTTTCGATCCATCGACCTCTGGGTTATGG                         | Northern blot probe |

|                            |                                                                                |                        |
|----------------------------|--------------------------------------------------------------------------------|------------------------|
| miR-U3 mimic               | AAGUUUCUCGGAACGUGUAGdTdT                                                       | siRNA                  |
| Scramble                   | UCGUAAGUAAGCGCAACCCdTdT                                                        | siRNA                  |
| GL2                        | CGUACGCGGAAUACUUCGAdTdT                                                        | siRNA<br>outcompeting  |
| Anti-miR-U3                | CTACACGTTTCAGAGAACT                                                            | miRNA LNA<br>inhibitor |
| Anti-miR-Neg               | TAACACGTCTATACGCCCA                                                            | miRNA LNA<br>inhibitor |
| ACA-45 1 copy<br>forward   | GGCCAAAGGTAGATAGAACAGGTC                                                       | Reporter<br>construct  |
| ACA-45 1 copy<br>reverse   | TCGAGACCTGTTCTATCTACCTTT                                                       | Reporter<br>construct  |
| ACA-45 3<br>copies forward | GGCCAAAGGTAGATAGAACAGGTCCCGGAAAGGTAGATA<br>TAGAACAGGTCCCGGAAAGGTAGATAGAACAGGTC | Reporter<br>construct  |
| ACA-45 3<br>copies reverse | TCGAGACCTGTTCTATCTACCTTTCCGGGACCTGTTCTA<br>TCTACCTTTCCGGGACCTGTTCTATCTACCTTT   | Reporter<br>construct  |
| U3 1 copy<br>forward       | GGCCAAGTTTCTCTGAACGTGTAG                                                       | Reporter<br>construct  |
| U3 1 copy<br>reverse       | TCGACTACACGTTTCAGAGAACTT                                                       | Reporter<br>construct  |
| U3 3 copies<br>forward     | GGCCAAGTTTCTCTGAACGTGTAGCCGGAAGTTTCTCT<br>GAACGTGTAGCCGGAAGTTTCTCTGAACGTGTAG   | Reporter<br>construct  |
| U3 3 copies<br>reverse     | TCGACTACACGTTTCAGAGAACTTCCGGCTACACGTTTC<br>AGAGAACTTCCGGCTACACGTTTCAGAGAACTT   | Reporter<br>construct  |
| miRNA-92a-3p<br>forward    | TCGAGACAGGCCGGGTTCTGTGCAATATATGCGGCCG<br>CATAT                                 | Reporter<br>construct  |
| miRNA-92a-3p<br>reverse    | GGCCGCATATATTGCACAGAACCCGGCCTGTCTCGAG<br>AGTA                                  | Reporter<br>construct  |
| Non-targeted<br>forward    | GGCCCACGTACGCGGAATACTTCGAAA                                                    | Reporter<br>construct  |
| Non-targeted<br>reverse    | TCGATTTCGAAGTATTCCGCGTACGTG                                                    | Reporter<br>construct  |
| U3-55K<br>Forward          | CCGGGCTTGACCTTCTCTGTGACATCTCGAGATGTCAC<br>AGAGAAGGTCAAGCTTTTTG                 | shRNA<br>cloning       |
| U3-55K<br>Reverse          | AATTCAAAAAGCTTGACCTTCTCTGTGACATCTCGAGAT<br>GTCACAGAGAAGGTCAAGC                 | shRNA<br>cloning       |
| Scramble<br>Forward        | CCGGTCCTAAGGTTAAGTCGCCCTCGCTCGAGCGAGG<br>GCGACTTAACCTTAGGTTTTTG                | shRNA<br>cloning       |
| Scramble<br>Reverse        | ATTCAAAAACCTAAGGTTAAGTCGCCCTCGCTCGAGCG<br>AGGGCGACTTAACCTTAGGA                 | shRNA<br>cloning       |

**Supplementary Table S2. Small RNA libraries analysed in this study**

| Description                 | GEO accession number | Reference  | Comment                       |
|-----------------------------|----------------------|------------|-------------------------------|
| HEK293                      | GSE136745            | This study | Ion Torrent small RNA library |
| HeLa cellular fractionation | GSE50057             | 52         | Ion Torrent small RNA library |

|                            |          |    |                                                                                                  |
|----------------------------|----------|----|--------------------------------------------------------------------------------------------------|
| snoRNPs<br>HEK293          | GSE43666 | 35 | PAR-CLIP of endogenous NOP56, Fibrillarin, Dyskerin and FLAG-NOP58. Size selection of small RNAs |
| DGCR8<br>HEK293            | GSE39086 | 31 | HITS-CLIP of FLAG and endogenous DGCR8                                                           |
| DICER<br>HEK293            | GSE55333 | 32 | PAR-CLIP of FLAG-Dicer1                                                                          |
| Knockouts small<br>RNA seq | GSE77989 | 26 | DICER, XPO5, DROSHA KO small RNA libraries                                                       |
| DROSHA-fCLIP               | GSE93651 | 30 | DROSHA f-CLIP                                                                                    |
| Argonaute<br>Hek293        | GSE21918 | 33 | PAR-CLIP FLAG-AGO 1 to 4                                                                         |
|                            | GSE50452 | 34 | CLASH libraries E1, E4 and E7                                                                    |
|                            | GSE58127 | 35 | RIP-seq using 2 antibodies against Argonaute                                                     |

### Supplementary Table S3. Antibodies used in this study

| Antibody                                    | Company                                   | Dilution |
|---------------------------------------------|-------------------------------------------|----------|
| GAPDH (ab8245)                              | Abcam, Cambridge, MA, USA                 | 1:5000   |
| DROSHA (ab12286)                            | Abcam, Cambridge, MA, USA                 | 1:1000   |
| XPO5 (sc-271036)                            | Santa Cruz Biotechnology, Dallas, TX, USA | 1:1000   |
| DICER (ab14601)                             | Abcam, Cambridge, MA, USA                 | 1:1000   |
| U3-55K (sc-515661)                          | Santa Cruz Biotechnology, Dallas, TX, USA | 1:500    |
| SNX27 (ab77799)                             | Abcam, Cambridge, MA, USA                 | 1:5000   |
| Anti-rabbit 800 IRDye<br>800CW              | LI-COR Biosciences, Lincoln, NE, USA      | 1:5000   |
| Antiy-rabbit 680 IRDye<br>680LT (926-68023) | LI-COR Biosciences, Lincoln, NE, USA      | 1:5000   |

**Supplementary Table S4. Parameters resulting from fitting of the model of miRNA-mediated regulation to the analytical flow cytometry data generated from HEK293 cells**

$\lambda$  is inversely proportional to  $K_{on}$  and  $\theta$  is proportional to miRNA expression level. For details see materials and methods (RSS=Residual sum of squares).

| Sample         | $\lambda$                                | $\theta$                      | RSS   |
|----------------|------------------------------------------|-------------------------------|-------|
| Control*       | 1.020                                    | 2.704                         | 4.069 |
| Empty*         | 0.9843                                   | 2.6989                        | 4.196 |
| miR-92a*       | 0.2773                                   | 5.6323                        | 5.051 |
| ACA45 1 copy   | 1.114                                    | Constant<br>( $\theta= 2.7$ ) | 4.287 |
| ACA45 3 copies | 0.741                                    |                               | 5.439 |
| U3 1 copy      | 1.123                                    |                               | 3.31  |
| U3 3 copies    | 0.627                                    |                               | 3.574 |
| Mock           | Constant<br>mir92a<br>( $\lambda=0.27$ ) | 8.882                         | 3.886 |
| Outcompeted    |                                          | 6.579                         | 3.876 |
| Mock           | Constant<br>ACA45<br>( $\lambda=0.27$ )  | 3.343                         | 6.005 |
| Outcompeted    |                                          | 3.071                         | 3.702 |
| Mock           | Constant<br>U3 ( $\lambda=0.27$ )        | 2.901                         | 4.033 |
| Outcompeted    |                                          | 2.584                         | 9.716 |

\*Empty, non-targeted and miR-92a used to calculate the initial values of parameters for constant  $\lambda$  and  $\theta$  for ACA45 and U3

**Supplementary Table S5. Parameters resulting from fitting of the model of miRNA-mediated regulation to the analytical flow cytometry data generated from HTC116 cells**

Lambda parameters were kept constant to determine relative expression using Theta.

(RSS=Residual sum of squares)

|             | WT       |       | DROSHA KO |       | DICER KO |       |
|-------------|----------|-------|-----------|-------|----------|-------|
|             | $\theta$ | RSS   | $\theta$  | RSS   | $\theta$ | RSS   |
| miR-21-5p   | 4.760    | 0.474 | 0.685     | 0.855 | 2.766    | 2.691 |
| miR-92a     | 1.721    | 5.343 | 0.997     | 0.960 | 0.698    | 1.535 |
| miR-320a    | 0.851    | 4.678 | 2.070     | 6.783 | 0.388    | 2.691 |
| U3-1 copy   | 0.400    | 1.601 | 0.876     | 0.966 | 0.393    | 1.088 |
| U3-3 copies | 0.445    | 1.601 | 1.169     | 1.622 | 0.469    | 1.552 |

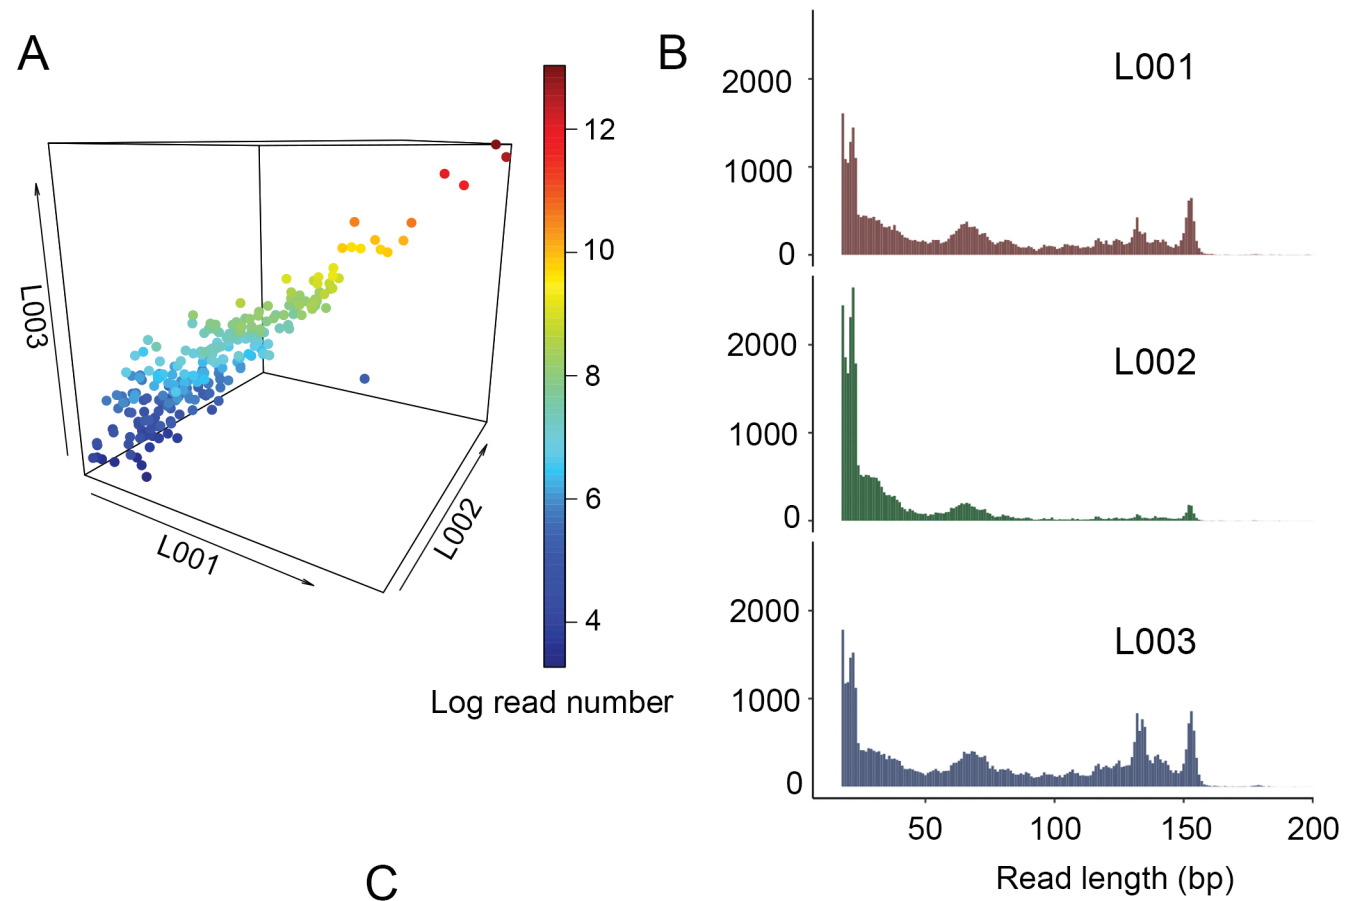

Lemus-Diaz *et al.* Supplementary Figure S1



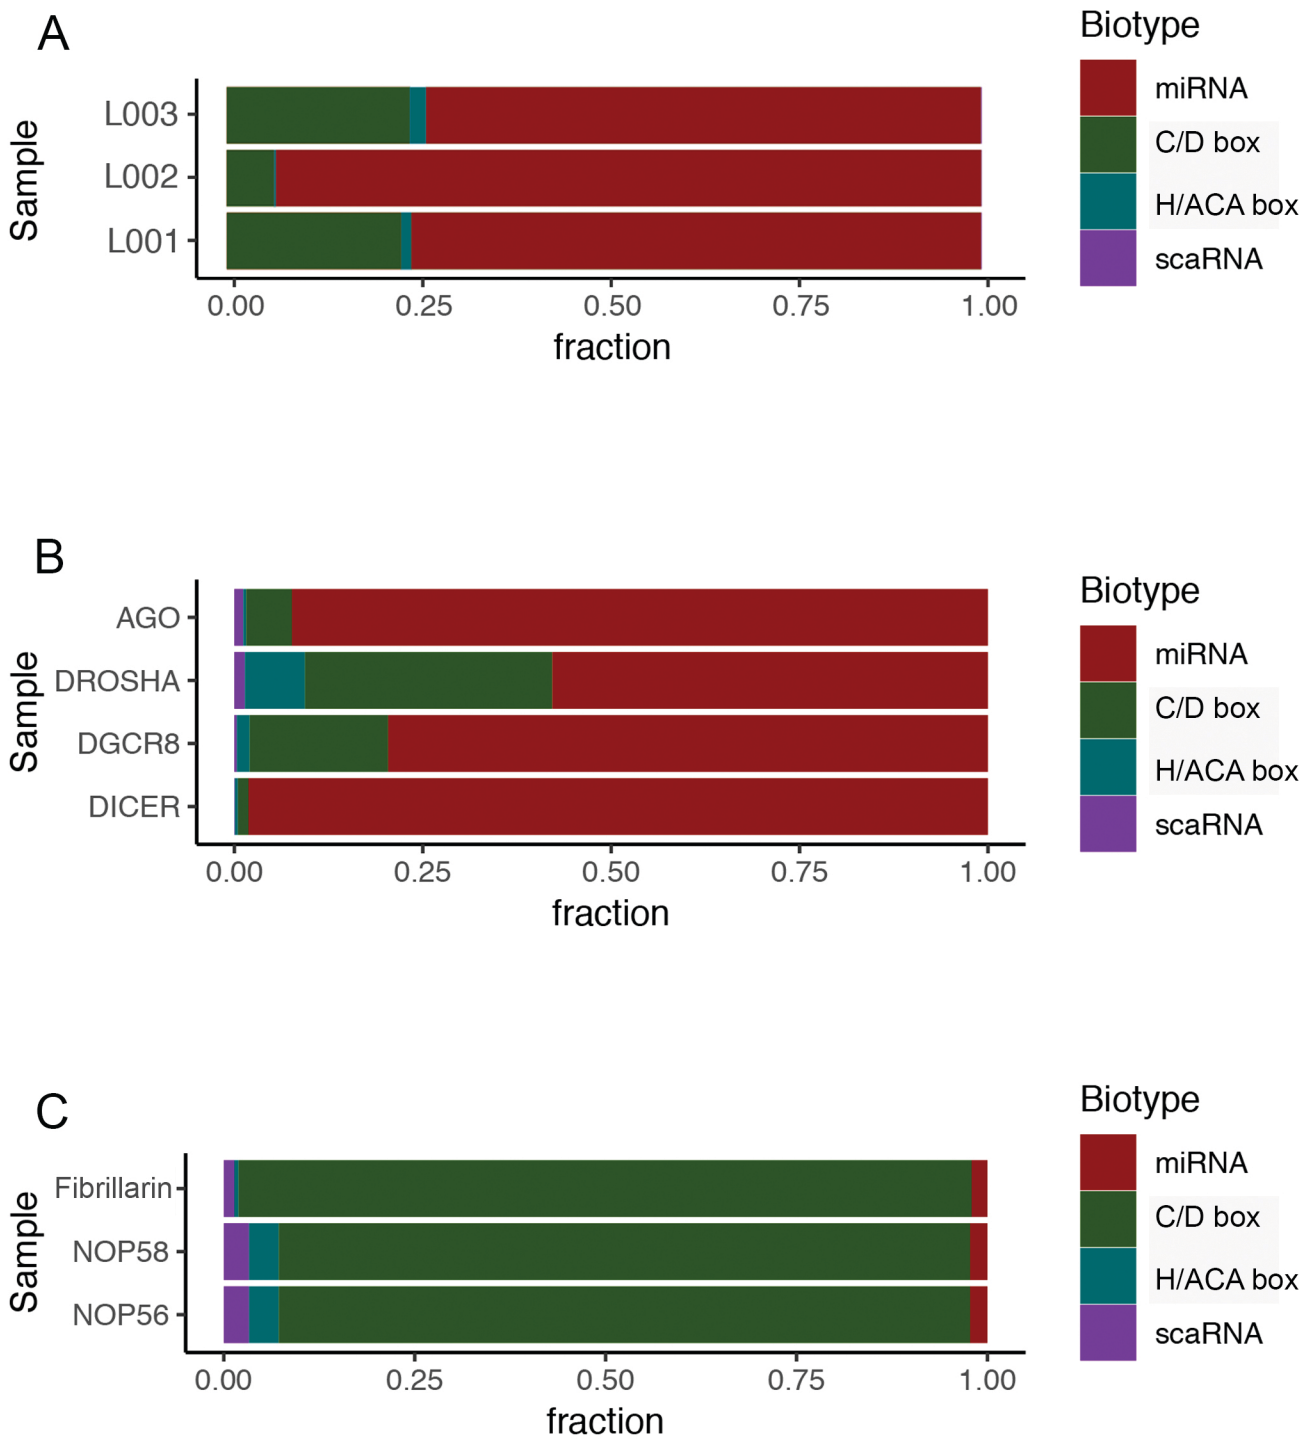

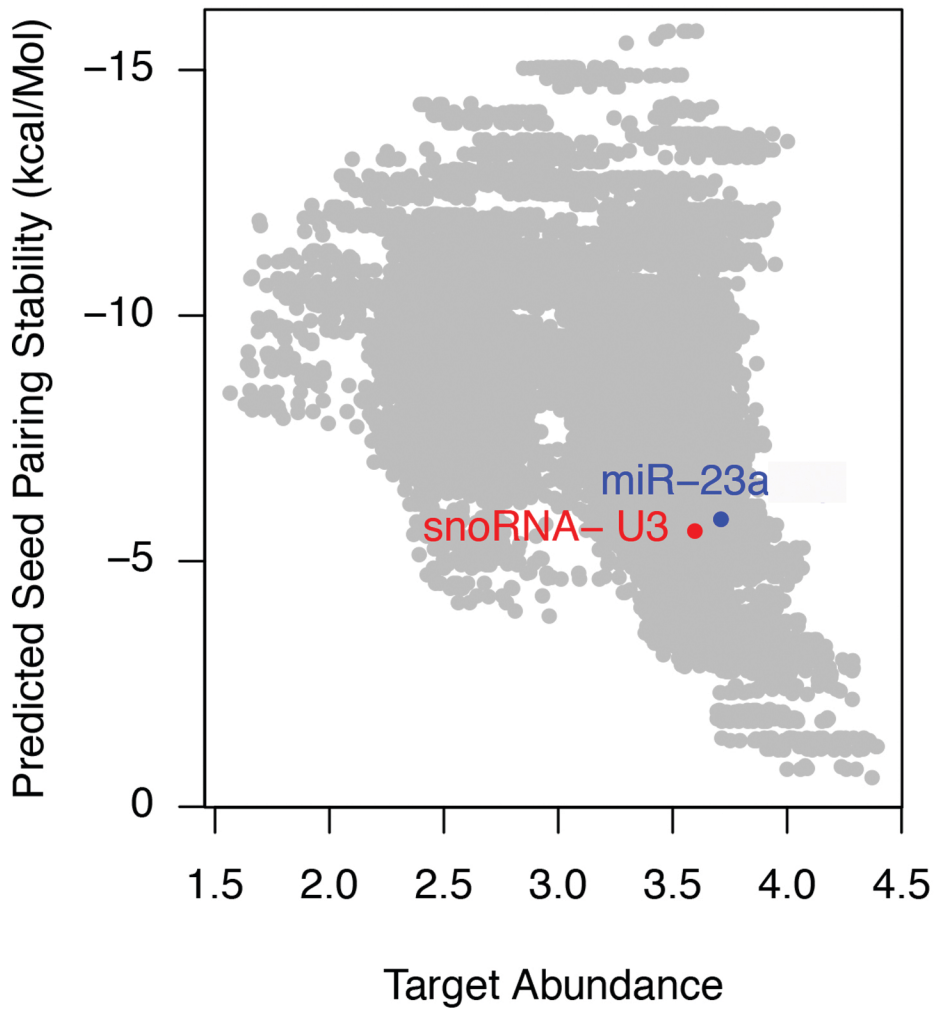

Lemus-Diaz *et al.* Supplementary Figure S3

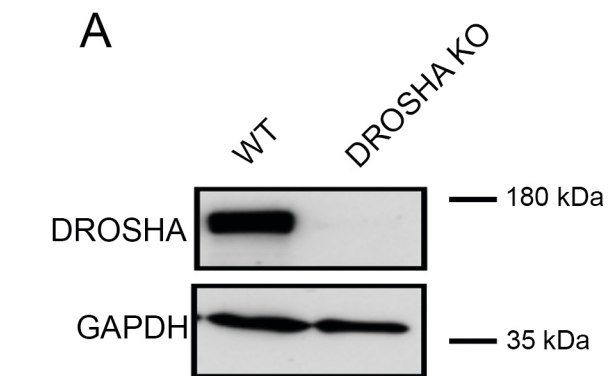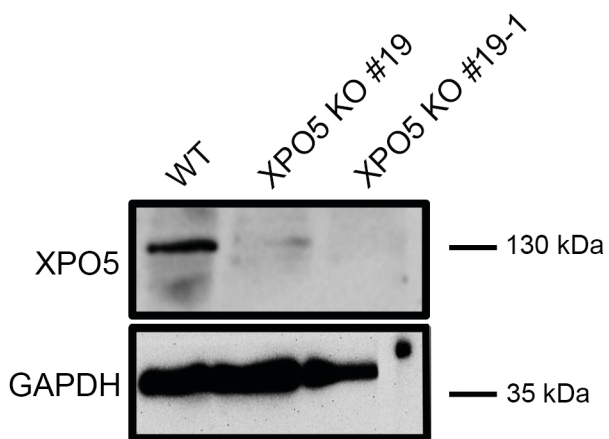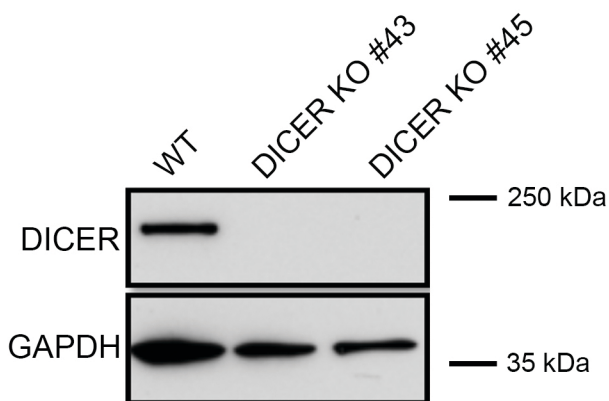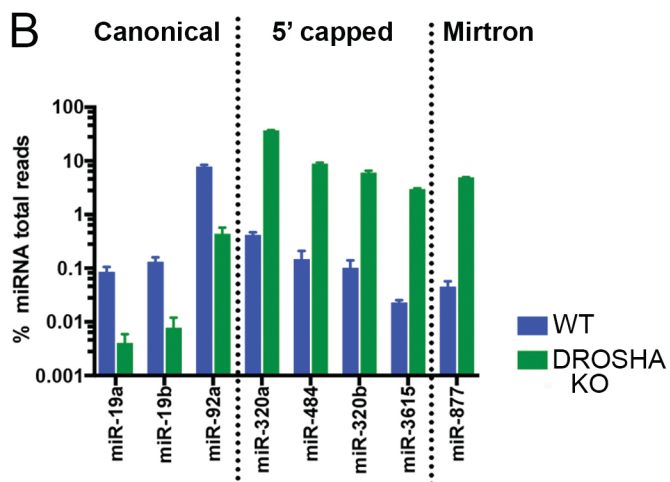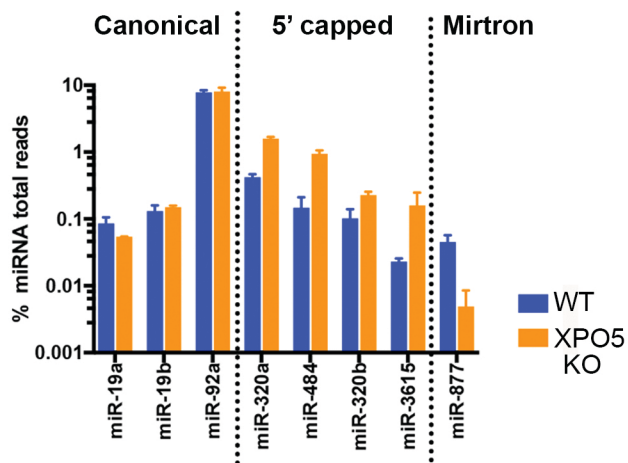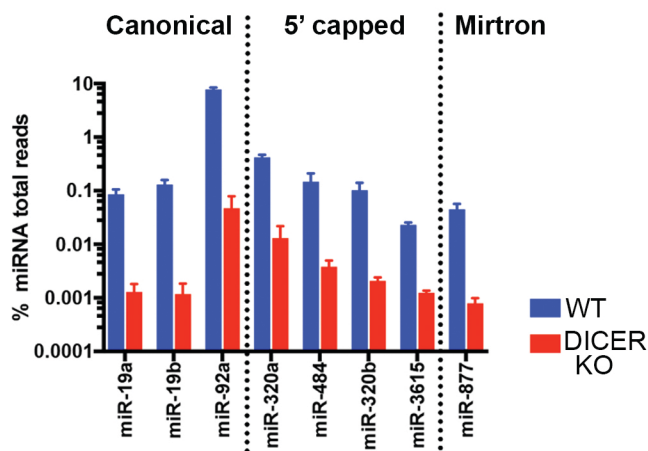

**A**

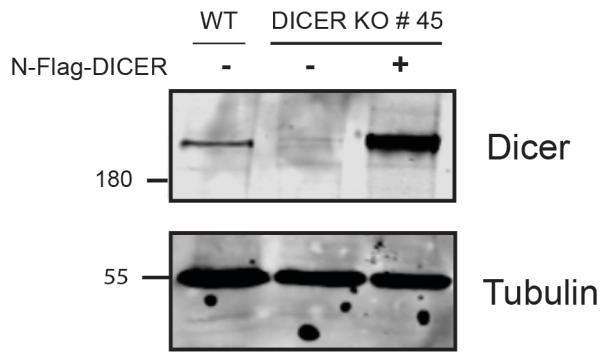

**B**

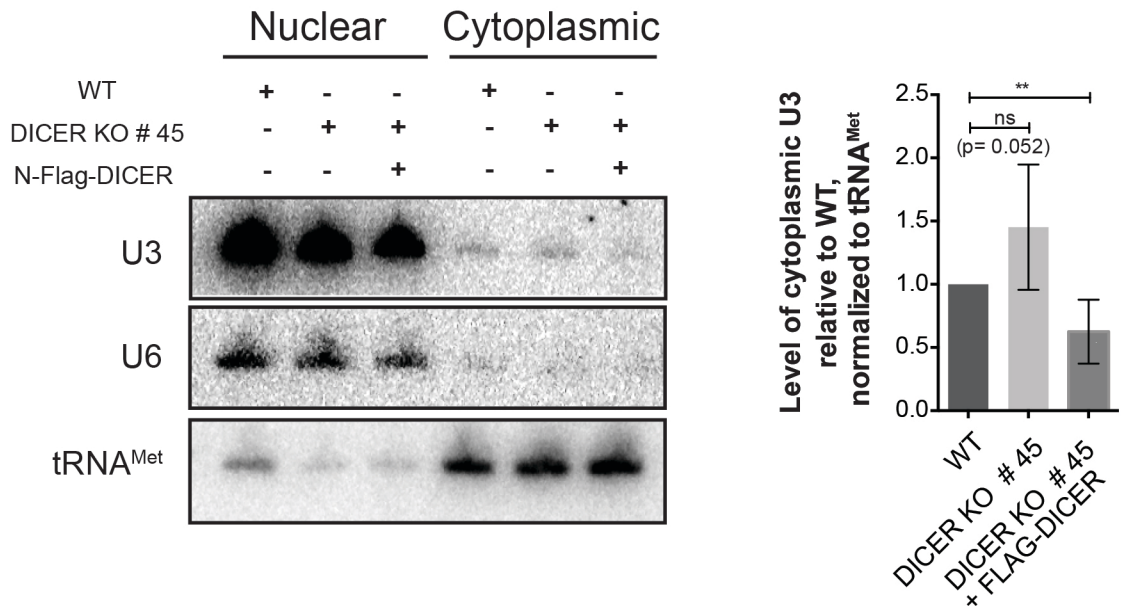

Lemus-Diaz *et al.* Supplementary Figure S5

# SNX27 UTR

9201

9280

|                     |          |                         |                 |          |                |
|---------------------|----------|-------------------------|-----------------|----------|----------------|
| H. sapiens          | UUU----- | CCCAGGCCAUGCACAUUUAAUUU | UUUUCAGAGAAACUC | -UAAUUGU | -AUUUUCACUGCAG |
| P. troglodytes      | UUU----- | CCCAGGCCAUGCACAUUUAAUUU | UUUUCAGAGAAACUC | -UAAUUGU | -AUUUUCACUGCAG |
| M. mulatta          | UUU----- | CCCAGGCCAUGCACAUUUAAUUU | UUUUCAGAGAAACUC | -UAAUUGU | -AUUUUCACUGCAG |
| D. novemcinctus     | CUC----- | CCCAGGCCAUGCACAUUUAAUUU | UUUUCAGAGAAACUC | -UAAUUGU | -AUUUUCACUGCAG |
| L. africana         | CUC----- | CCCAGGCCAUGCACAUUUAAUUU | UUUUGAGAGAAACUC | -UAAUUGU | -AUUUUCACUGCAG |
| M. musculus         | UUU----- | CCCAGGCCAUGCACAUUUAAUUU | UUUUGAGAGAAAC   | -UAAUUGU | -AUUUUCACUGCAG |
| R. norvegicus       | UUU----- | CCCAGGCCAUGCACAUUUAAUUU | UUUUGAGAGAAAC   | -UAAUUGU | -AUUUUCACUGCAG |
| O. cuniculus        | UUU----- | CCCAGGCCAUCCACAUUUAAUUU | UUUUGAGAGAAACUC | -UAAUUGU | -AUUUUCACUGCAG |
| C. lupus familiaris | UCC----- | CCCAGGCCAUGCACAUUUAAUUU | UUUUGAGAGAAACUC | -UAAUUGU | -AUUUUCACUGCAG |
| B. taurus           | UUC----- | CCCAAACCAUGCACAUUUAAUUU | UUUUGAGAGAAACUC | -UAAUUGU | -AUUUUCACUGCAG |
| E. telfairi         | CUC----- | CCCAGGCCGUGCACAUUUAAUUU | UUUUGAGAGAAACUC | -UAAUUGU | -AUUUUCACUGCAG |
| G. gallus           | -----    | -----                   | -----           | -----    | -----          |
| X. tropicalis       | -----    | -----                   | -----           | -----    | -----          |

# snoRNA U3

2

112

|                     |                                               |         |                |                 |
|---------------------|-----------------------------------------------|---------|----------------|-----------------|
| H. sapiens          | AAGACUAUACUUUCAGGGAUCAUUUCUAUAGUUGUUACUAGAGA  | AGUUUCU | CUGAACGUGUAGAG | CACCGAAAACCACG  |
| P. troglodytes      | AAGACUAUACUUUCAGGGAUCAUUUCUAUAGUUCGUUACUAGAGA | AGUUUCU | CUGAACGUGUAGAG | CACCGAAAACCACG  |
| M. mulatta          | AAGACUAUACUUUCAGGGAUCAUUUCUAUAGUUGUUACUAGAGA  | AGUUUCU | CUGAACGUGUAGAG | CACCGAAAACCACG  |
| D. novemcinctus     | AAGACUAUACUUUCAGGGAUCAUUUCUAUAGUUGUUACUAGAGA  | AGUUUCU | CUGAACGUGUAGAG | CACCGAAAACCACG  |
| L. africana         | AAGACUAUACUUUCAGGGAUCAUUUCUAUAGUUCGUUACUAGAGA | AGUUUCU | CUGAACGUGUAGAG | CACCGAAAACCACG  |
| M. musculus         | AAGACUAUACUUUCAGGGAUCAUUUCUAUAGUUCGUUACUAGAGA | AGUUUCU | CUGAACGUGUAGAG | CACCGAAAACCACG  |
| R. norvegicus       | AAGACUAUACUUUCAGGGAUCAUUUCUAUAGUUCGUUACUAGAGA | AGUUUCU | CUGAACGUGUAGAG | CACCGAAAACCACG  |
| O. cuniculus        | AAGACUAUACUUUCAGGGAUCAUUUCUAUAGUUCGUUACUAGAGA | AGUUUCU | CUGAACGUGUAGAG | CACCGAAAACCACG  |
| C. lupus familiaris | AAGACUAUACUUUCAGGGAUCAUUUCUAUAGUUGUUACUAGAGA  | AGUUUCU | CUGAACGUGUAGAG | CACCGAAAACCACG  |
| B. taurus           | AAGACUAUACUUUCAGGGAUCAUUUCUAUAGUUCGUUACUAGAGA | AGUUUCU | CUGAACGUGUAGAG | CACCGAAAACCACG  |
| E. telfairi         | AAGACUAUACUUUCAGGGAUCAUUUCUAUAGUUCGUGACUAGAGA | AGUUUCU | CUGAACGUGUAGAG | CACCGAAAACCACG  |
| G. gallus           | AGGACUAUACUUUCAGGGAUCAUUUCUGUAGUUGGUAACUAGAGG | AGUUGU  | GAUCGAAAGUGU   | CCGGCGUCACAAACC |
| X. tropicalis       | AAGACUAUACUUUCAGGGAUCAUUUCUAUAGUUGUACCGUGUGA  | AGUUGU  | GCGUCUAAAGUGU  | CUGAACUCACAAACC |

Lemus-Diaz *et al.* Supplementary Figure S6
